# Supplementary material
Source: PubMed Central journal article supplement (PMC4972460)
Supplement: NIHMS806110-supplement-Supplementary_Materials.pdf [file NIHMS806110-supplement-Supplementary_Materials.pdf]

Supplementary Materials for  
**Synergistically acting agonists and antagonists of G protein–coupled  
receptors prevent photoreceptor cell degeneration**

Yu Chen,\* Grazyna Palczewska, Ikuo Masuho, Songqi Gao, Hui Jin, Zhiqian Dong,  
Linn Gieser, Matthew J. Brooks, Philip D. Kiser, Timothy S. Kern,  
Kirill A. Martemyanov, Anand Swaroop, Krzysztof Palczewski\*

\*Corresponding author. Email: [chenyu6639@hotmail.com](mailto:chenyu6639@hotmail.com) (Y.C.); [kxp65@case.edu](mailto:kxp65@case.edu) (K.P.)

Published 26 July 2016, *Sci. Signal.* **9**, ra74 (2016)  
DOI: 10.1126/scisignal.aag0245

**This PDF file includes:**

Fig. S1. *Abca4*<sup>-/-</sup>*Rdh8*<sup>-/-</sup> mice exposed to bright light exhibit pyknosis of photoreceptor cells, diminished synaptophysin in the OPL, and altered horizontal cell morphology.

Fig. S2. Pharmacological pretreatments targeting different GPCRs preserve retinal structure in bright light–exposed *Abca4*<sup>-/-</sup>*Rdh8*<sup>-/-</sup> mice.

Fig. S3. Variable preservation of retinal morphology by pharmacological pretreatments targeting different GPCRs in bright light–exposed *Abca4*<sup>-/-</sup>*Rdh8*<sup>-/-</sup> mice.

Fig. S4. Pharmacological pretreatment affecting various GPCRs preserves retinal function in bright light–exposed *Abca4*<sup>-/-</sup>*Rdh8*<sup>-/-</sup> mice.

Fig. S5. BRM or MTP pretreatment protects retinas of BALB/c mice from bright light–induced degeneration.

Fig. S6. Transcriptome analysis of the retina.

Fig. S7. Dose-dependent protection of retinal morphology in *Abca4*<sup>-/-</sup>*Rdh8*<sup>-/-</sup> mice by BRM, MTP, and TAM pretreatment.

Fig. S8. Combined pretreatments improve retinal morphological protection against bright light–exposed *Abca4*<sup>-/-</sup>*Rdh8*<sup>-/-</sup> mice.

Fig. S9. Combined treatments with subeffective doses of individual drugs exhibit improved retinal morphological protection in bright light–exposed *Abca4*<sup>-/-</sup>*Rdh8*<sup>-/-</sup> mice.

Fig. S10. Combined pretreatments protect retinas of BALB/c mice from bright light–induced photoreceptor degeneration.

Table S1. Retinal gene sets significantly altered in response to bright light exposure in *Abca4<sup>-/-</sup>Rdh8<sup>-/-</sup>* mice.

Table S2. Retinal gene sets beneficially regulated by BRM pretreatment.

Table S3. Retinal gene sets beneficially affected by MTP pretreatment.

Table S4. Retinal gene sets beneficially affected by TAM pretreatment.

Table S5. Retinal gene sets beneficially affected by DOX pretreatment.

Table S6. Significantly altered retinal gene sets as a result of bright light exposure in *Abca4<sup>-/-</sup>Rdh8<sup>-/-</sup>* mice.

Table S7. Retinal gene sets beneficially affected as a result of combined pretreatment with BRM, MTP, and TAM.

Table S8. Retinal gene sets beneficially affected as a result of combined pretreatment with BRM, MTP, and DOX.

## Figure S1

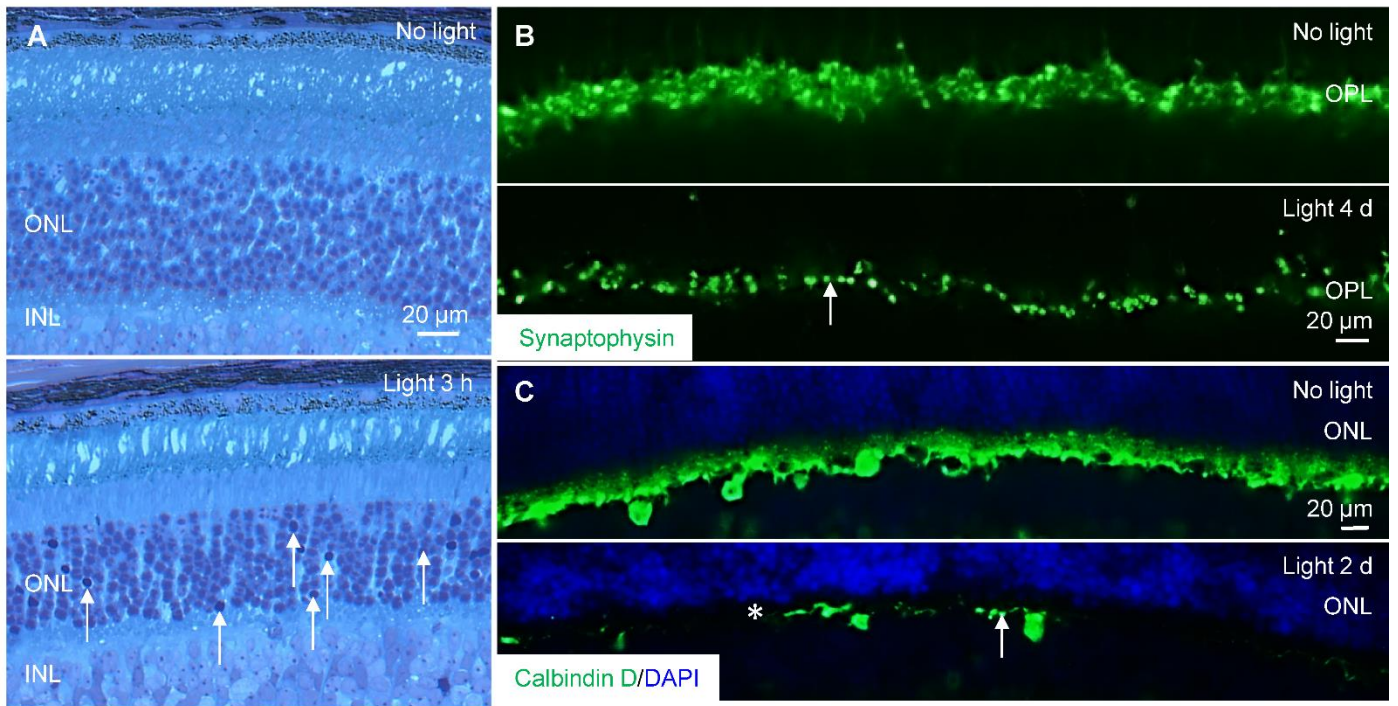

**Figure S1. *Abca4*<sup>-/-</sup>*Rdh8*<sup>-/-</sup> mice exposed to bright light exhibit pyknosis of photoreceptor cells, diminished synaptophysin in the OPL, and altered horizontal cell morphology.** (A). Retinal thick sections from pigmented *Abca4*<sup>-/-</sup>*Rdh8*<sup>-/-</sup> mice unexposed to bright light (No light) and 3 h after light exposure (Light 3 h) were stained with toluidine blue and examined by light microscopy. White arrows indicate pyknotic photoreceptor cells. Scale bar: 20  $\mu$ m. (B, C) Albino *Abca4*<sup>-/-</sup>*Rdh8*<sup>-/-</sup> mice were exposed to bright light at 10,000 lux for 1 h. Retinal cryosections were prepared from mice unexposed to bright light and at indicated times after light exposure, i.e. 2 d (Light 2d) and 4 d (Light 4d). Immunohistochemistry was performed to assess the expression of synaptophysin (B) and calbindin D (C). ONL: outer nuclear layer; OPL: outer plexiform layer. White arrows in B and C indicate representative areas in the OPL with diminished expression of synaptophysin and calbindin D, respectively. Asterisks in C identify areas where calbindin D immunoreactivity was not readily detected. Scale bar: 20  $\mu$ m.

## Figure S2

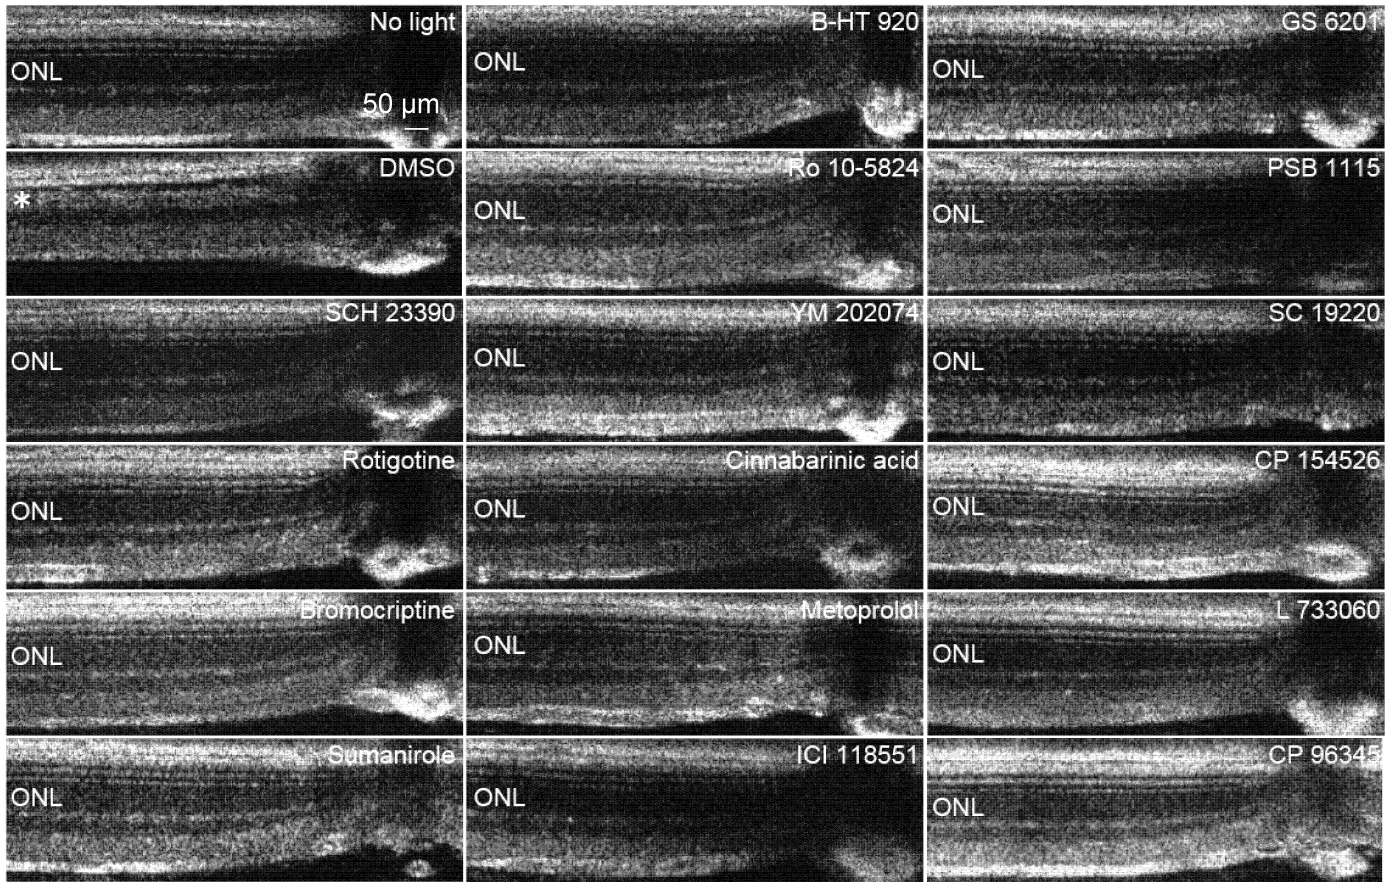

**Figure S2. Pharmacological pretreatments targeting different GPCRs preserve retinal structure in bright light-exposed *Abca4*<sup>-/-</sup>*Rdh8*<sup>-/-</sup> mice.** OCT imaging was performed to examine retinal structures in *Abca4*<sup>-/-</sup>*Rdh8*<sup>-/-</sup> mice either unexposed to bright light, or with light exposure after pretreatment with either DMSO or the compounds indicated in **Table 2** that modulate the activity of GPCRs. ONL: outer nuclear layer. Asterisk marks severely attenuated ONL. OCT was performed 7 days after bright light.

## Figure S3

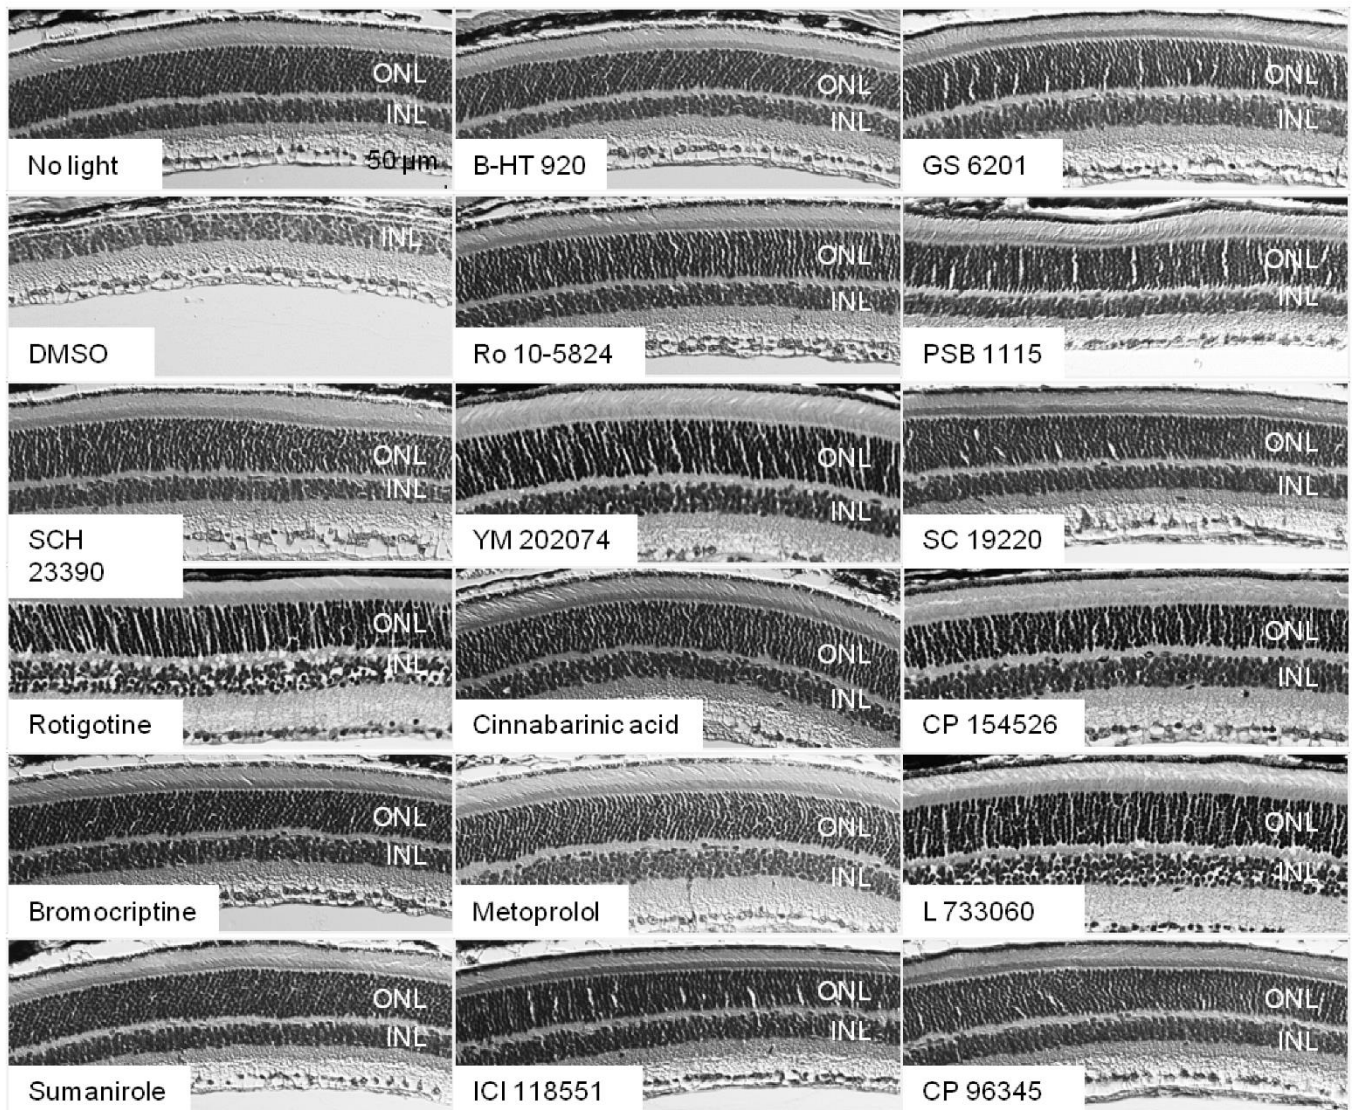

**Figure S3. Variable preservation of retinal morphology by pharmacological pretreatments targeting different GPCRs in bright light-exposed *Abca4*<sup>-/-</sup>*Rdh8*<sup>-/-</sup> mice.** H&E staining of paraffin sections of eyes from *Abca4*<sup>-/-</sup>*Rdh8*<sup>-/-</sup> mice was performed either without light exposure, or 14 days after bright light exposure and pretreatment with either DMSO or the indicated compounds listed in **Table 2**. ONL: outer nuclear layer; INL: inner nuclear layer. Scale bar: 50 µm.



**Figure S4**

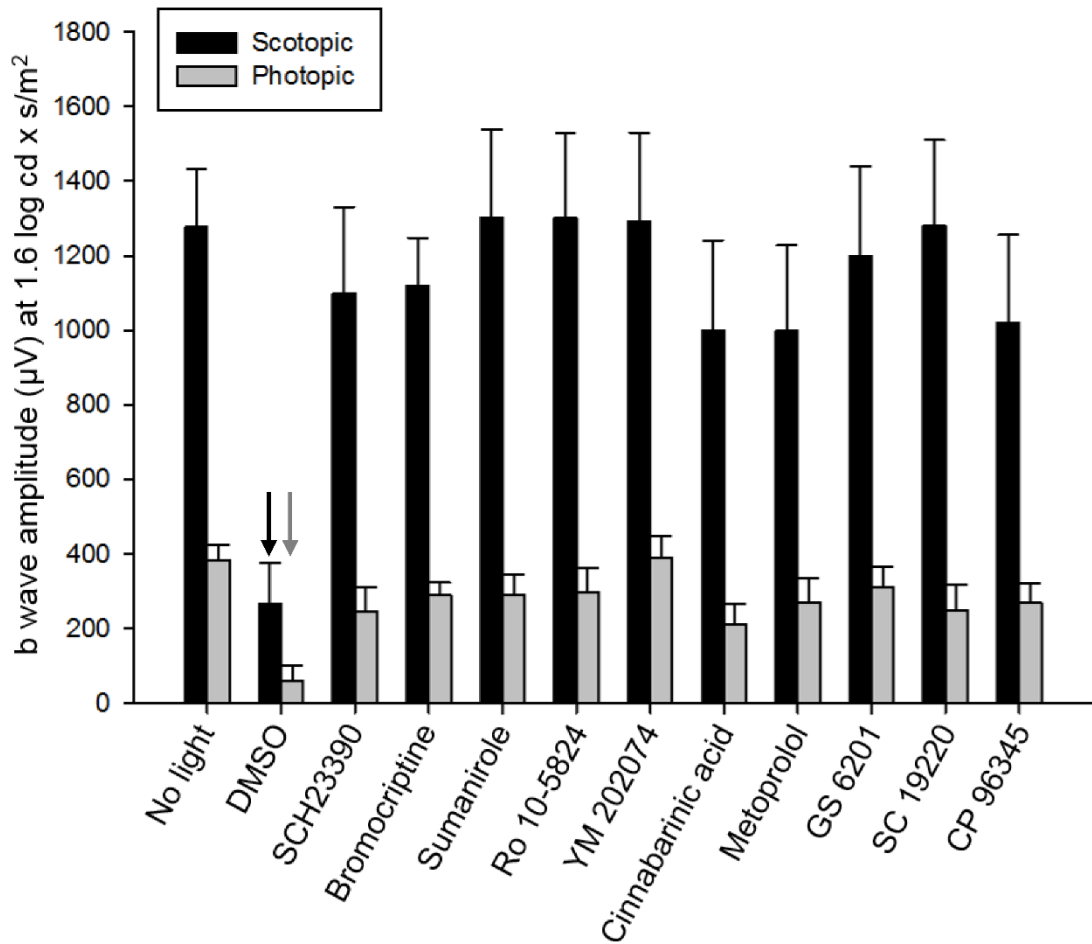

**Figure S4. Pharmacological pretreatment affecting various GPCRs preserves retinal function in bright light-exposed *Abca4<sup>-/-</sup>Rdh8<sup>-/-</sup>* mice.** ERG analyses of retinal function were performed in *Abca4<sup>-/-</sup>Rdh8<sup>-/-</sup>* mice either unexposed to bright light, or with light exposure and pretreatment with either DMSO or the indicated compounds listed in **Table 2**. Black and grey arrows highlight the decreased scotopic and photopic b wave amplitudes, respectively, in light-exposed, DMSO-treated mice. ERG was performed 10 days after bright light exposure.

## Figure S5

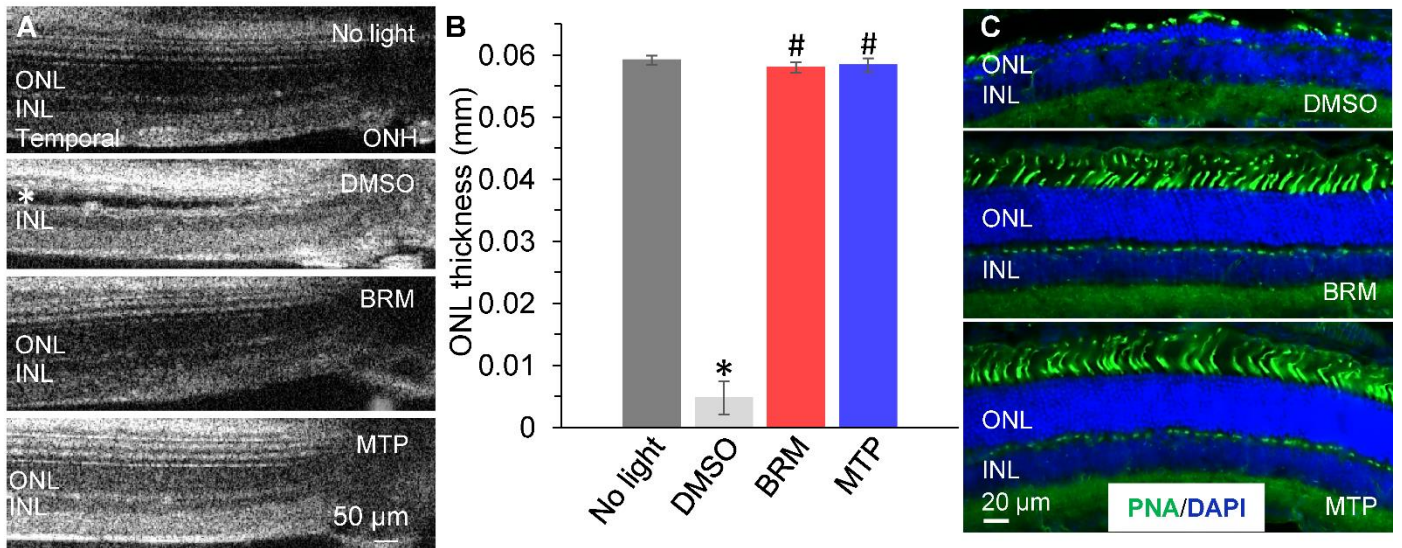

**Figure S5. BRM or MTP pretreatment protects retinas of BALB/c mice from bright light-induced degeneration.** (A) BALB/c mice were pretreated as indicated, and exposed to bright light. OCT imaging was performed 7 d later to examine retinal structures either unexposed to bright light, exposed to bright light and pretreated with DMSO, exposed to bright light and pretreated with BRM at 2.5 mg/kg bw (BRM), or exposed to bright light and pretreated with MTP at 10 mg/kg bw (MTP). (B) ONL thickness was measured in OCT images 0.45 mm away from the ONH in the temporal retina. \* Compared to No light,  $P < 0.05$ ; # Compared to DMSO,  $P < 0.05$ . ONH: optic nerve head; ONL: outer nuclear layer; INL: inner nuclear layer. Asterisk indicates reduced ONL thickness. (C) Retinal expression of PNA (green) along with DAPI counterstaining (blue) was examined in cryosections collected from light-exposed BALB/c mice pretreated with either DMSO, BRM or MTP. Scale bar; 20  $\mu$ m.

**Figure S7**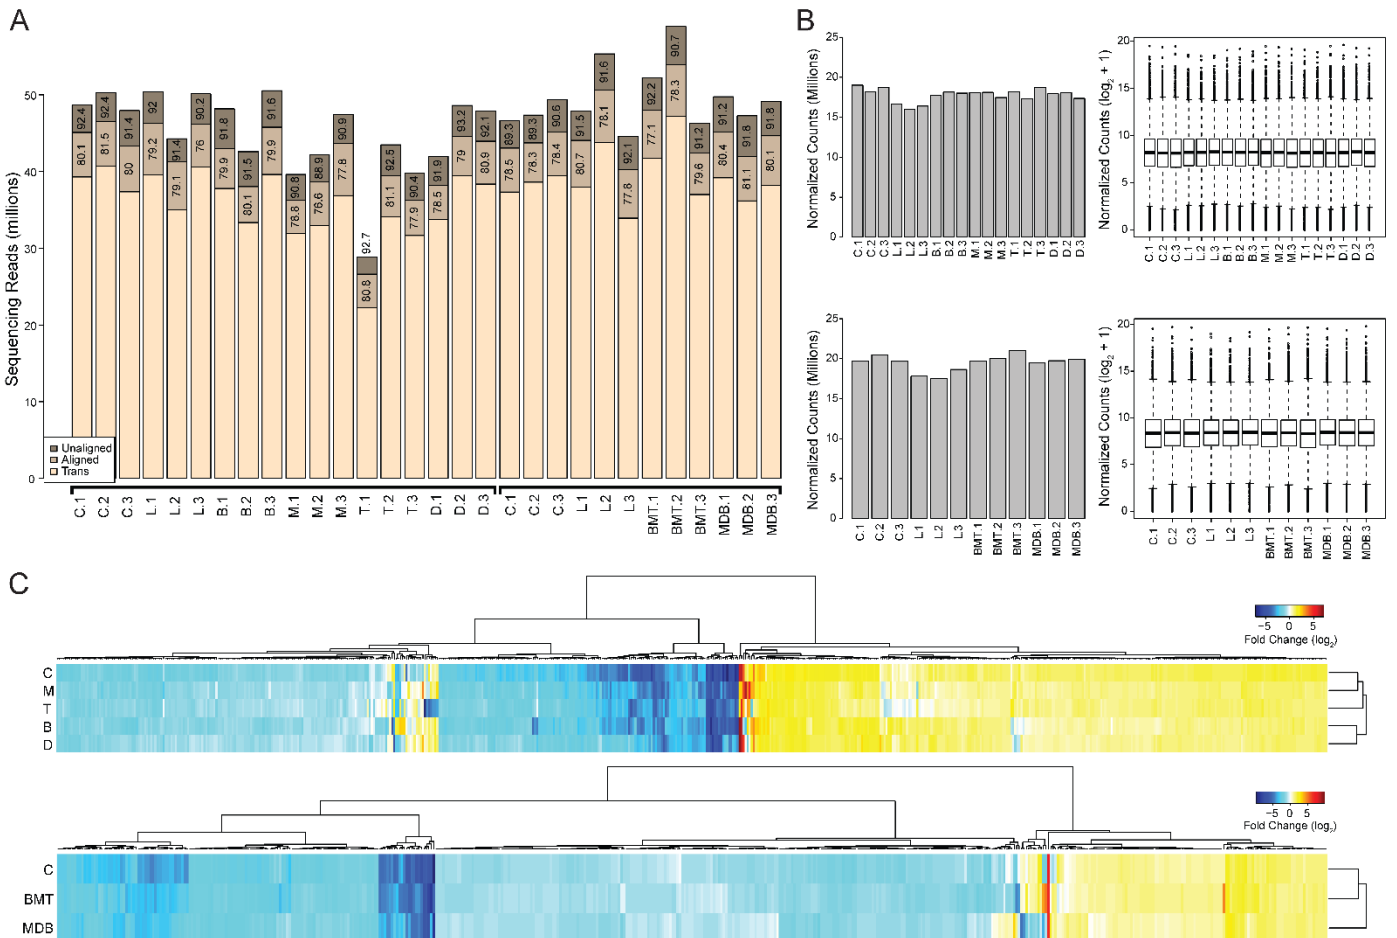

**Figure S6. Transcriptome analysis of the retina.** Sequencing depth and alignment statistics for the RNA-seq experiment performed for retinal samples collected from *Abca4<sup>-/-</sup>Rdh8<sup>-/-</sup>* mice unexposed to bright light (C), light-exposed mice pretreated with DMSO vehicle control (L), or BRM (B), MTP (M), TAM (T), DOX (D), BMT (B+M+T) and MDB (B+M+D). Doses used for retinal transcriptome analyses of the mice receiving mono treatment were: 1 mg/kg bw for BRM, 10 mg/kg bw for MTP, 2.5 mg/kg bw for TAM and 10 mg/kg bw for DOX. Doses for combined treatment with B+M+T were 0.1 mg/kg bw for BRM, 1 mg/kg bw for MTP and 0.05 mg/kg bw for TAM. Doses for combined treatment with B+M+D were 0.1 mg/kg bw for BRM, 1 mg/kg bw for MTP and 1 mg/kg bw for DOX. (A) Trans indicates the number of reads mapping to the known gene annotation. Aligned are the amounts of intronic and intergenic reads mapping to the genome. Unaligned are the number of reads not successfully aligned. (B) Shown also are the normalized count values and distribution after normalization of the mono pretreatments (upper) and combination pretreatments (lower). (C) Clustering of the fold change values is evident from the differential expression analysis of the mono pretreatments (upper) and combination pretreatments (lower).



**Figure S7**

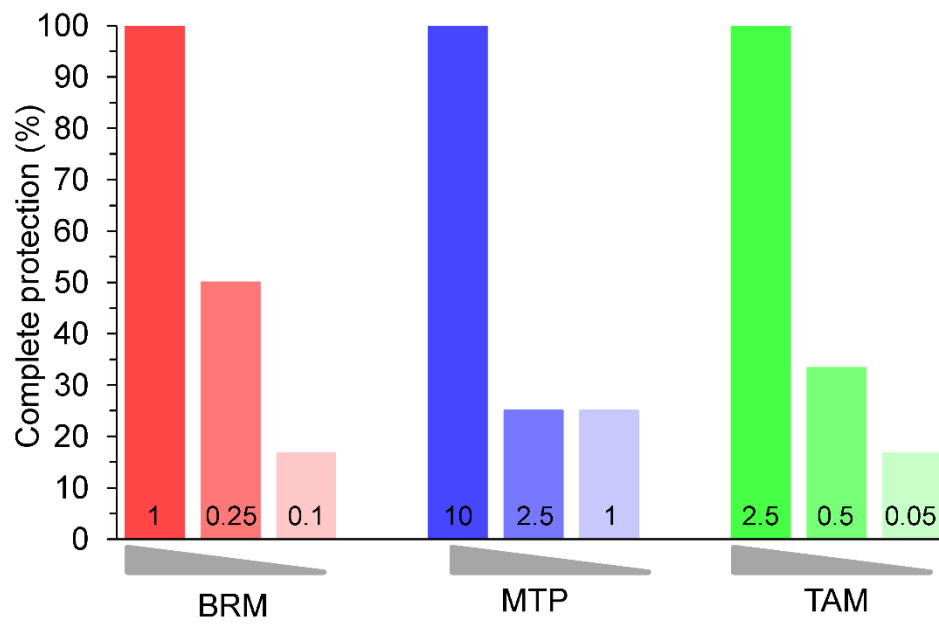

**Figure S7. Dose-dependent protection of retinal morphology in *Abca4*<sup>-/-</sup>*Rdh8*<sup>-/-</sup> mice by BRM, MTP, and TAM pretreatment.** *Abca4*<sup>-/-</sup>*Rdh8*<sup>-/-</sup> mice pretreated with different doses of BRM, MTP, and TAM were exposed to bright light. OCT imaging was performed 7 d after light exposure. The percentage of complete retinal protection is summarized for each treatment delivered at the dose indicated.

**Figure S8**

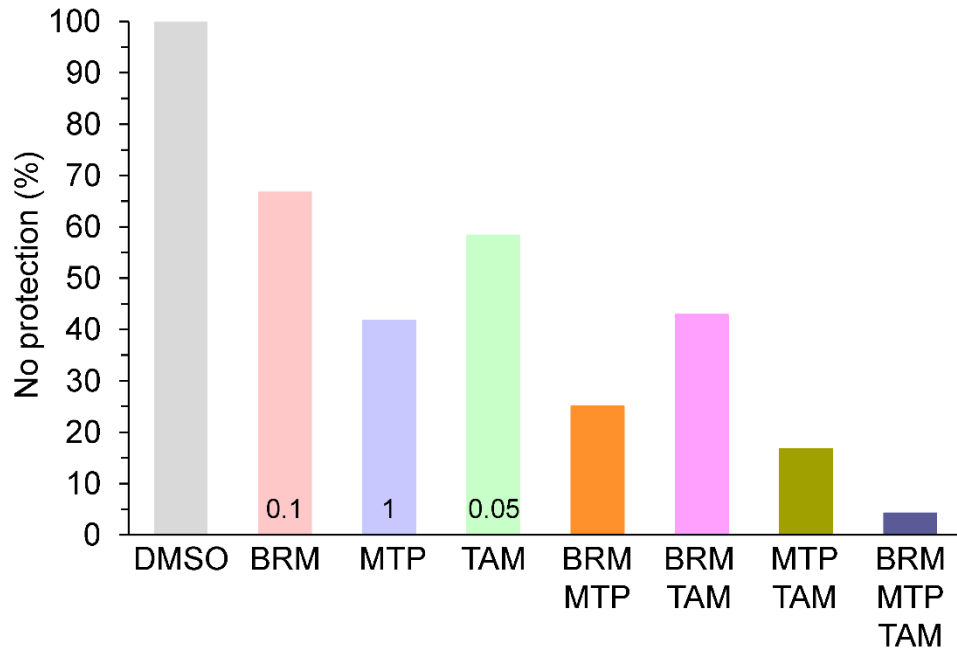

**Figure S8. Combined pretreatments improve retinal morphological protection against bright light-exposed in *Abca4<sup>-/-</sup>Rdh8<sup>-/-</sup>* mice.** Either BRM, MTP, or TAM was administered individually at a sub-effective dose to *Abca4<sup>-/-</sup>Rdh8<sup>-/-</sup>* mice or in a combined pretreatment consisting of two or three of these compounds, each at its sub-effective dose. This was followed by exposure to bright light and OCT imaging performed 7 d later. Percentages of mice manifesting no protection of retinal structures were calculated for each condition. Doses for either mono or combined pretreatments were 0.1 mg/kg bw, 1 mg/kg bw, and 0.05 mg/kg bw for BRM, MTP and TAM, respectively.

## Figure S9

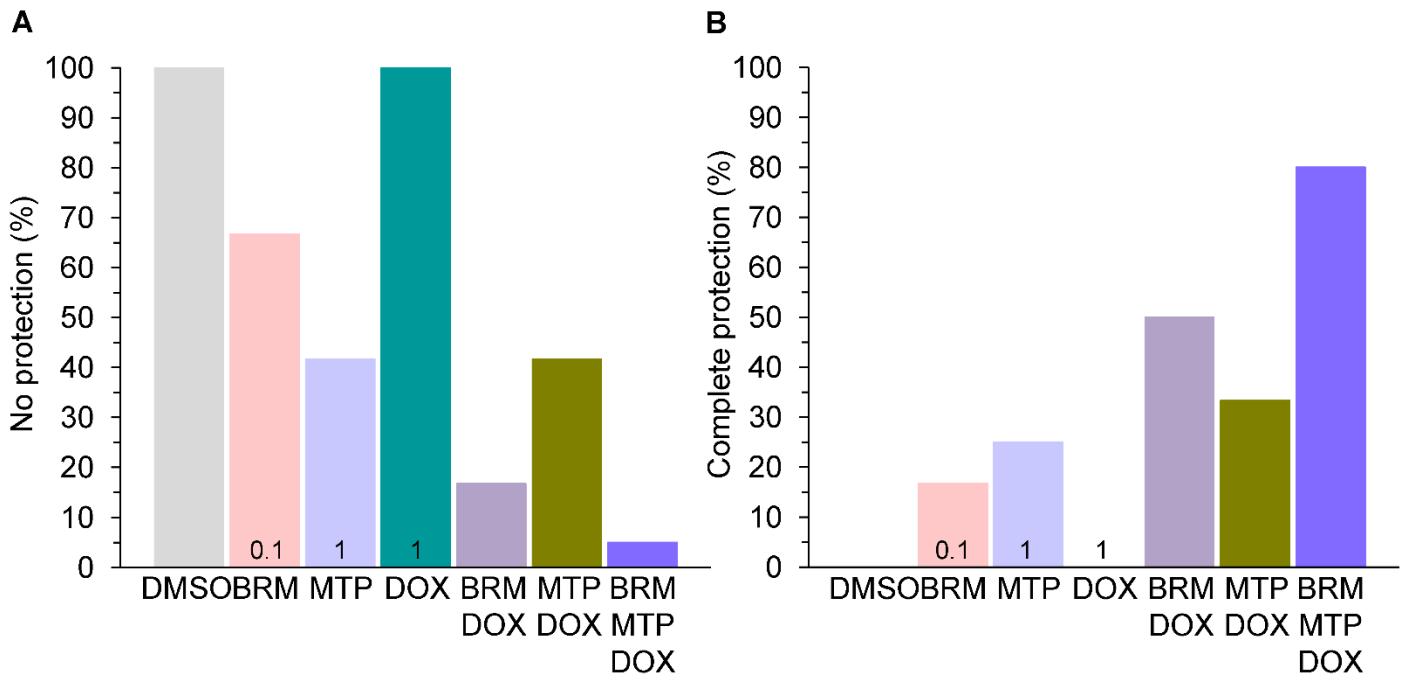

**Figure S9. Combined treatments with subeffective doses of individual drugs exhibit improved retinal morphological protection in bright light-exposed *Abca4*<sup>-/-</sup>*Rdh8*<sup>-/-</sup> mice.** BRM, MTP, or DOX was individually administered at a sub-effective dose or together with one or two other compounds, each delivered at a sub-effective dose, to *Abca4*<sup>-/-</sup>*Rdh8*<sup>-/-</sup> mice prior to bright light exposure. OCT imaging was performed 7 d after light exposure. The percentage of mice manifesting either (A) no protection or (B) complete protection of retinal structure is summarized for each treatment. Doses in all conditions were 0.1 mg/kg bw, 1 mg/kg bw, and 1 mg/kg bw for BRM, MTP and DOX, respectively.

## Figure S10

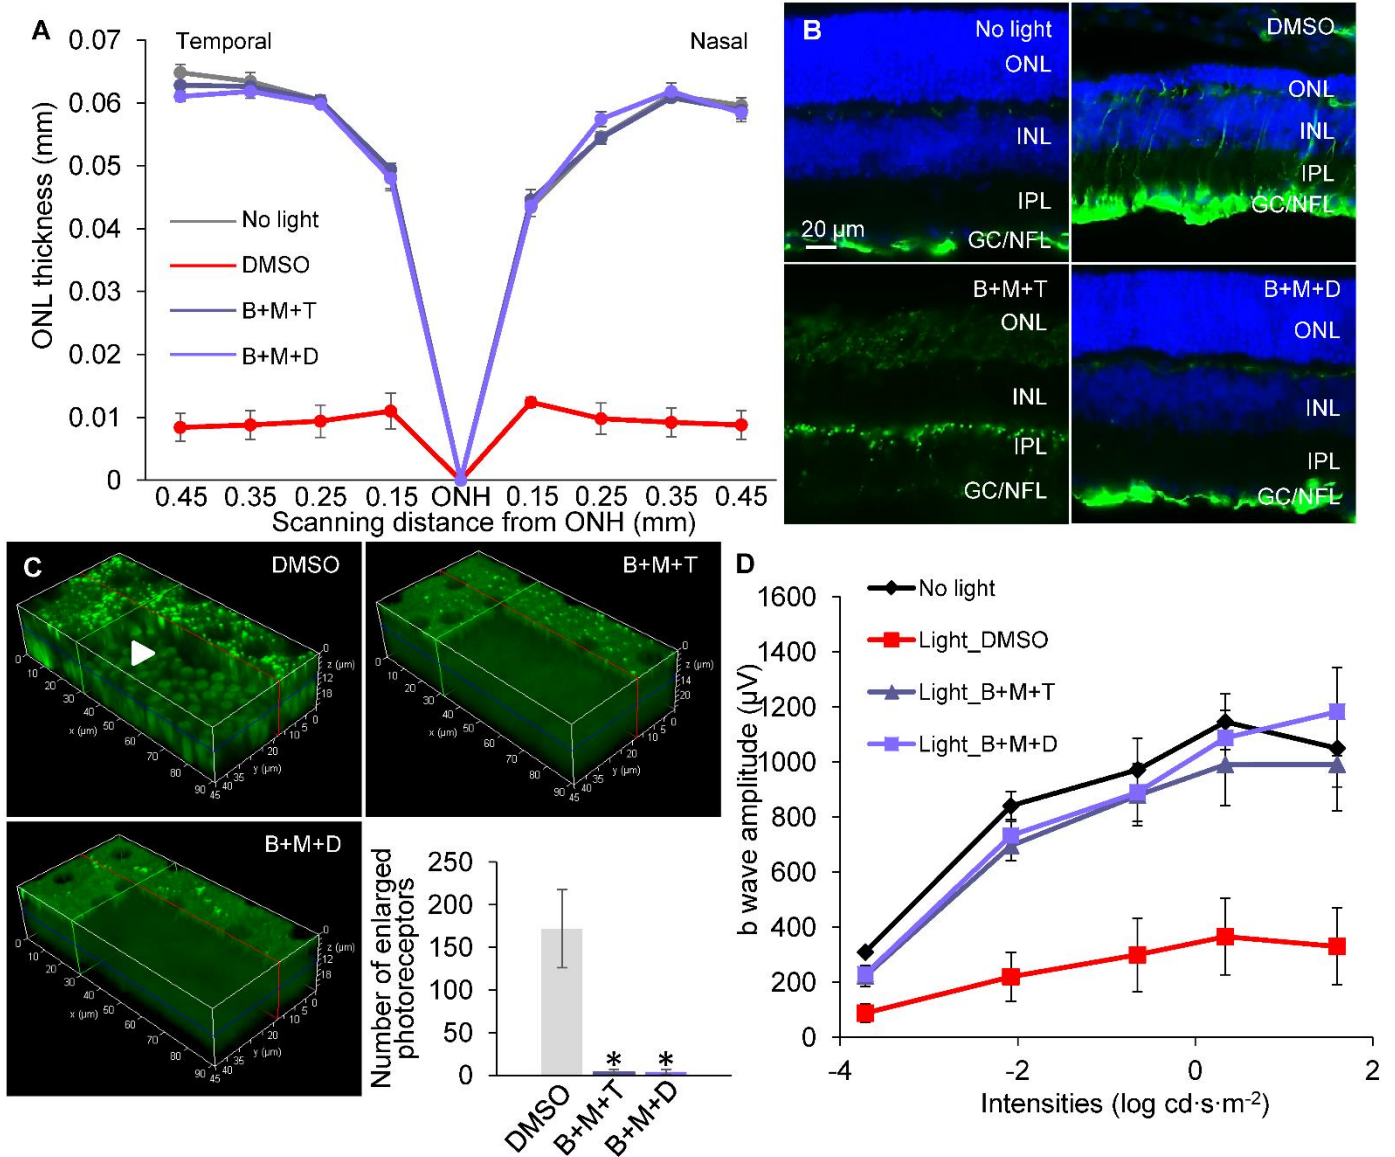

**Figure S10. Combined pretreatments protect retinas of BALB/c mice from bright light-induced photoreceptor degeneration.** BALB/c mice were exposed to bright light after pretreatment with DMSO, a combination of either BRM (0.1 mg/kg bw), MTP (1 mg/kg bw) and TAM (0.05 mg/kg bw) (B+M+T) or a combination of BRM (0.1 mg/kg bw), MTP (1 mg/kg bw) and DOX (1 mg/kg bw) (B+M+D). **(A)** OCT imaging of BALB/c mice was performed 7 days following exposure to bright light. Thicknesses of the ONL were measured from the OCT images. ONH: optic nerve head; ONL: outer nuclear layer; INL: inner nuclear layer. **(B)** Cryosections were prepared from BALB/c mice either unexposed to bright light or 2 weeks after bright light exposure. Retinal GFAP staining (green) was then determined by immunohistochemistry with DAPI counterstaining (blue). ONL: outer nuclear layer; INL: inner nuclear layer; IPL: inner plexiform layer; GC: ganglion cell; NFL: nerve fiber layer. Scale bar: 20 µm. **(C)** TPM imaging was performed 3 days after light exposure to examine the changes in photoreceptors; enlarged photoreceptors were quantified. White arrowhead indicates an enlarged photoreceptor cell. # Compared to DMSO,  $P < 0.05$ ,  $n = 5$ . **(D)** ERG examinations were performed 10 days after light exposure and the changes in scotopic b wave amplitudes were analyzed after ERG recordings.

**Table S1. Retinal gene sets significantly altered in response to bright light exposure in *Abca4<sup>-/-</sup>Rdh8<sup>-/-</sup>* mice.** Gene expression in the retinas from *Abca4<sup>-/-</sup>Rdh8<sup>-/-</sup>* mice exposed to bright light was compared to the gene expression in the retinas from mice that had not been exposed to bright light.

| Gene set name                                              | NES <sup>a</sup> | NOM <i>P</i> value <sup>b</sup> |
|------------------------------------------------------------|------------------|---------------------------------|
| CYTOKINE-CYTOKINE RECEPTOR INTERACTION                     | 2.499941         | 0                               |
| P53 SIGNALING PATHWAY                                      | 2.294004         | 0                               |
| OSTEOCLAST DIFFERENTIATION                                 | 2.254599         | 0                               |
| JAK-STAT SIGNALING PATHWAY                                 | 2.226176         | 0                               |
| TOLL-LIKE RECEPTOR SIGNALING PATHWAY                       | 2.14331          | 0                               |
| LEISHMANIASIS                                              | 2.114414         | 0                               |
| RHEUMATOID ARTHRITIS                                       | 2.106262         | 0                               |
| MEASLES                                                    | 2.09881          | 0                               |
| INFLUENZA A                                                | 2.080741         | 0                               |
| HEPATITIS C                                                | 1.949769         | 0                               |
| CHAGAS DISEASE (AMERICAN TRYPANOSOMIASIS)                  | 1.907339         | 0                               |
| PROTEASOME                                                 | 1.84367          | 0                               |
| APOPTOSIS                                                  | 1.834949         | 0                               |
| MAPK SIGNALING PATHWAY                                     | 1.812699         | 0                               |
| RIG-I-LIKE RECEPTOR SIGNALING PATHWAY                      | 1.786783         | 0                               |
| TUBERCULOSIS                                               | 1.731797         | 0                               |
| REGULATION OF ACTIN CYTOSKELETON                           | 1.68178          | 0                               |
| PATHWAYS IN CANCER                                         | 1.542123         | 0.001311                        |
| CYTOSOLIC DNA-SENSING PATHWAY                              | 1.853622         | 0.001667                        |
| AXON GUIDANCE                                              | 1.604034         | 0.002813                        |
| GAP JUNCTION                                               | 1.681527         | 0.003053                        |
| TOXOPLASMOSIS                                              | 1.663511         | 0.003106                        |
| CHEMOKINE SIGNALING PATHWAY                                | 1.615531         | 0.004219                        |
| MALARIA                                                    | 1.849309         | 0.00531                         |
| CELL CYCLE                                                 | 1.631867         | 0.005806                        |
| CELL ADHESION MOLECULES (CAMS)                             | 1.64954          | 0.006051                        |
| LEUKOCYTE TRANSENDOTHELIAL MIGRATION                       | 1.63332          | 0.006098                        |
| PATHOGENIC ESCHERICHIA COLI INFECTION                      | 1.607625         | 0.013514                        |
| T CELL RECEPTOR SIGNALING PATHWAY                          | 1.54441          | 0.015337                        |
| MELANOMA                                                   | 1.561813         | 0.017268                        |
| ANTIGEN PROCESSING AND PRESENTATION                        | 1.594037         | 0.017742                        |
| PANCREATIC CANCER                                          | 1.62309          | 0.020472                        |
| BLADDER CANCER                                             | 1.573655         | 0.025042                        |
| B CELL RECEPTOR SIGNALING PATHWAY                          | 1.524973         | 0.026359                        |
| TGF-BETA SIGNALING PATHWAY                                 | 1.479011         | 0.027994                        |
| EPITHELIAL CELL SIGNALING IN HELICOBACTER PYLORI INFECTION | 1.436208         | 0.031204                        |
| PHAGOSOME                                                  | 1.444337         | 0.032593                        |
| PROSTATE CANCER                                            | 1.441207         | 0.033588                        |
| MINERAL ABSORPTION                                         | 1.461418         | 0.03413                         |
| FOCAL ADHESION                                             | 1.407668         | 0.034722                        |
| NATURAL KILLER CELL MEDIATED CYTOTOXICITY                  | 1.467622         | 0.035144                        |
| NEUROACTIVE LIGAND-RECEPTOR INTERACTION                    | 1.389158         | 0.036309                        |
| RENAL CELL CARCINOMA                                       | 1.419761         | 0.037258                        |
| NEUROTROPHIN SIGNALING PATHWAY                             | 1.361332         | 0.047026                        |



|                                                       |          |          |
|-------------------------------------------------------|----------|----------|
| PHOTOTRANSDUCTION                                     | -2.71384 | 0        |
| OXIDATIVE PHOSPHORYLATION                             | -1.78353 | 0        |
| PARKINSON'S DISEASE                                   | -1.3712  | 0.015432 |
| GLYCOSYLPHOSPHATIDYLINOSITOL(GPI)-ANCHOR BIOSYNTHESIS | -1.54824 | 0.021898 |
| ETHER LIPID METABOLISM                                | -1.51432 | 0.033981 |
| ABC TRANSPORTERS                                      | -1.52816 | 0.041363 |

<sup>a</sup>NES: normalized enrichment score.

<sup>b</sup>NOM *P* value: nominal *P* value.

**Table S2. Retinal gene sets beneficially regulated by BRM pretreatment.** Gene expression in the retinas from DMSO-treated light-exposed *Abca4<sup>-/-</sup>Rdh8<sup>-/-</sup>* mice was compared to the gene expression in the retinas from BRM-pretreated light-exposed mice.

| Gene set name                             | NES <sup>a</sup> | NOM <i>P</i> value <sup>b</sup> |
|-------------------------------------------|------------------|---------------------------------|
| INFLUENZA A                               | 2.316076         | 0                               |
| CYTOKINE-CYTOKINE RECEPTOR INTERACTION    | 2.311251         | 0                               |
| OSTEOCLAST DIFFERENTIATION                | 2.292695         | 0                               |
| TOLL-LIKE RECEPTOR SIGNALING PATHWAY      | 2.20026          | 0                               |
| JAK-STAT SIGNALING PATHWAY                | 2.190011         | 0                               |
| HEPATITIS C                               | 2.172245         | 0                               |
| LEISHMANIASIS                             | 2.067241         | 0                               |
| TUBERCULOSIS                              | 2.06043          | 0                               |
| P53 SIGNALING PATHWAY%KEGG                | 2.059358         | 0                               |
| MEASLES                                   | 2.041737         | 0                               |
| RIG-I-LIKE RECEPTOR SIGNALING PATHWAY     | 2.030246         | 0                               |
| CYTOSOLIC DNA-SENSING PATHWAY             | 1.996471         | 0                               |
| RHEUMATOID ARTHRITIS                      | 1.964366         | 0                               |
| CHAGAS DISEASE (AMERICAN TRYPANOSOMIASIS) | 1.928461         | 0                               |
| MAPK SIGNALING PATHWAY                    | 1.697178         | 0                               |
| APOPTOSIS                                 | 1.74725          | 0.001808                        |
| CELL CYCLE                                | 1.725497         | 0.001828                        |
| CHEMOKINE SIGNALING PATHWAY               | 1.665321         | 0.001873                        |
| T CELL RECEPTOR SIGNALING PATHWAY         | 1.781596         | 0.003831                        |
| MALARIA                                   | 1.811571         | 0.004158                        |
| TOXOPLASMOSIS                             | 1.596552         | 0.007859                        |
| RIBOSOME BIOGENESIS IN EUKARYOTES         | 1.518271         | 0.012146                        |
| PROTEASOME                                | 1.577355         | 0.017442                        |
| NOD-LIKE RECEPTOR SIGNALING PATHWAY       | 1.556338         | 0.023346                        |
| ANTIGEN PROCESSING AND PRESENTATION       | 1.601986         | 0.024668                        |
| PYRIMIDINE METABOLISM                     | 1.465657         | 0.025926                        |
| VIBRIO CHOLERAEE INFECTION                | 1.503147         | 0.037328                        |
| BLADDER CANCER                            | 1.467256         | 0.04142                         |
| B CELL RECEPTOR SIGNALING PATHWAY         | 1.474744         | 0.041502                        |
| PHAGOSOME                                 | 1.403161         | 0.047957                        |
| PHOTOTRANSDUCTION                         | -2.42237         | 0                               |
| PROTEIN DIGESTION AND ABSORPTION          | -1.88516         | 0                               |
| OXIDATIVE PHOSPHORYLATION                 | -1.52288         | 0.010799                        |
| ECM-RECEPTOR INTERACTION                  | -1.47            | 0.032538                        |
| PARKINSON'S DISEASE                       | -1.37642         | 0.043981                        |
| BILE SECRETION                            | -1.41742         | 0.046316                        |

<sup>a</sup> NES: normalized enrichment score.

<sup>b</sup> NOM *P* value: nominal *P* value.

**Table S3. Retinal gene sets beneficially affected by MTP pretreatment.** Gene expression in the retinas from DMSO-treated light-exposed *Abca4*<sup>-/-</sup>*Rdh8*<sup>-/-</sup> mice was compared to the gene expression in the retinas from MTP-pretreated light-exposed mice

| Gene set name                                              | NES <sup>a</sup> | NOM <i>P</i> value <sup>b</sup> |
|------------------------------------------------------------|------------------|---------------------------------|
| CYTOKINE-CYTOKINE RECEPTOR INTERACTION                     | 2.298575         | 0                               |
| HEPATITIS C                                                | 2.114615         | 0                               |
| JAK-STAT SIGNALING PATHWAY                                 | 2.091388         | 0                               |
| LEISHMANIASIS                                              | 2.05127          | 0                               |
| MEASLES                                                    | 2.051036         | 0                               |
| TOLL-LIKE RECEPTOR SIGNALING PATHWAY                       | 2.04943          | 0                               |
| P53 SIGNALING PATHWAY                                      | 2.038268         | 0                               |
| INFLUENZA A%KEGG                                           | 2.020124         | 0                               |
| OSTEOCLAST DIFFERENTIATION                                 | 2.007467         | 0                               |
| PROTEASOME                                                 | 1.898456         | 0                               |
| RHEUMATOID ARTHRITIS                                       | 1.858606         | 0                               |
| CHAGAS DISEASE (AMERICAN TRYPANOSOMIASIS)                  | 1.847138         | 0                               |
| CELL CYCLE                                                 | 1.671191         | 0                               |
| MAPK SIGNALING PATHWAY                                     | 1.653268         | 0                               |
| REGULATION OF ACTIN CYTOSKELETON                           | 1.614068         | 0.001232                        |
| PHAGOSOME                                                  | 1.671424         | 0.001346                        |
| RIG-I-LIKE RECEPTOR SIGNALING PATHWAY                      | 1.83438          | 0.001464                        |
| MALARIA                                                    | 1.759778         | 0.001621                        |
| TUBERCULOSIS                                               | 1.730178         | 0.002646                        |
| PATHOGENIC ESCHERICHIA COLI INFECTION                      | 1.656261         | 0.002954                        |
| CYTOSOLIC DNA-SENSING PATHWAY                              | 1.761675         | 0.003049                        |
| NEUROTROPHIN SIGNALING PATHWAY                             | 1.538862         | 0.005057                        |
| APOPTOSIS                                                  | 1.614587         | 0.005525                        |
| LEUKOCYTE TRANSENDOTHELIAL MIGRATION                       | 1.69688          | 0.005563                        |
| MINERAL ABSORPTION                                         | 1.654049         | 0.008104                        |
| PATHWAYS IN CANCER                                         | 1.418722         | 0.010381                        |
| ANTIGEN PROCESSING AND PRESENTATION                        | 1.650826         | 0.010448                        |
| TOXOPLASMOSIS                                              | 1.535752         | 0.010825                        |
| CELL ADHESION MOLECULES (CAMS)                             | 1.624701         | 0.011511                        |
| GAP JUNCTION                                               | 1.481687         | 0.015131                        |
| BLADDER CANCER                                             | 1.568963         | 0.016641                        |
| FOCAL ADHESION                                             | 1.410039         | 0.017456                        |
| CHEMOKINE SIGNALING PATHWAY                                | 1.448831         | 0.024204                        |
| T CELL RECEPTOR SIGNALING PATHWAY                          | 1.432076         | 0.025956                        |
| ECM-RECEPTOR INTERACTION                                   | 1.497648         | 0.026316                        |
| MELANOMA                                                   | 1.472294         | 0.030523                        |
| SHIGELLOSIS                                                | 1.504511         | 0.030856                        |
| B CELL RECEPTOR SIGNALING PATHWAY                          | 1.47098          | 0.032689                        |
| LYSOSOME                                                   | 1.393048         | 0.033854                        |
| EPITHELIAL CELL SIGNALING IN HELICOBACTER PYLORI INFECTION | 1.451014         | 0.034188                        |
| AMOEBIASIS                                                 | 1.482668         | 0.035765                        |
| PROSTATE CANCER                                            | 1.412496         | 0.039161                        |

|                                 |          |          |
|---------------------------------|----------|----------|
| PHOTOTRANSDUCTION               | -2.74171 | 0        |
| OXIDATIVE PHOSPHORYLATION       | -1.40455 | 0.019084 |
| FRUCTOSE AND MANNOSE METABOLISM | -1.56356 | 0.019553 |
| GLUTAMATERGIC SYNAPSE           | -1.33414 | 0.025926 |

<sup>a</sup> NES: normalized enrichment score.

<sup>b</sup> NOM *P* value: nominal *P* value.

**Table S4. Retinal gene sets beneficially affected by TAM pretreatment.** Gene expression in the retinas from DMSO-treated light-exposed *Abca4*<sup>-/-</sup>*Rdh8*<sup>-/-</sup> mice was compared to the gene expression in the retinas from TAM-pretreated light-exposed mice

| Gene set name                                              | NES <sup>a</sup> | NOM <i>P</i> value <sup>b</sup> |
|------------------------------------------------------------|------------------|---------------------------------|
| CYTOKINE-CYTOKINE RECEPTOR INTERACTION                     | 2.287917         | 0                               |
| PROTEASOME                                                 | 1.989326         | 0                               |
| P53 SIGNALING PATHWAY                                      | 1.980445         | 0                               |
| JAK-STAT SIGNALING PATHWAY                                 | 1.953612         | 0                               |
| CYTOSOLIC DNA-SENSING PATHWAY                              | 1.915203         | 0                               |
| MEASLES                                                    | 1.886409         | 0                               |
| OSTEOCLAST DIFFERENTIATION                                 | 1.878713         | 0                               |
| TOLL-LIKE RECEPTOR SIGNALING PATHWAY                       | 1.833643         | 0                               |
| HEPATITIS C                                                | 1.83041          | 0                               |
| RIG-I-LIKE RECEPTOR SIGNALING PATHWAY                      | 1.798662         | 0                               |
| INFLUENZA A                                                | 1.795979         | 0                               |
| REGULATION OF ACTIN CYTOSKELETON                           | 1.69899          | 0                               |
| MAPK SIGNALING PATHWAY                                     | 1.527737         | 0                               |
| PATHWAYS IN CANCER                                         | 1.504636         | 0.001242                        |
| FOCAL ADHESION                                             | 1.582052         | 0.001357                        |
| LEISHMANIASIS                                              | 1.814122         | 0.001582                        |
| AXON GUIDANCE                                              | 1.583195         | 0.002725                        |
| LEUKOCYTE TRANSENDOTHELIAL MIGRATION                       | 1.704037         | 0.002882                        |
| RIBOSOME BIOGENESIS IN EUKARYOTES                          | 1.640137         | 0.002894                        |
| PATHOGENIC ESCHERICHIA COLI INFECTION                      | 1.767884         | 0.003021                        |
| RIBOSOME                                                   | 1.631069         | 0.004367                        |
| PHAGOSOME                                                  | 1.641816         | 0.00438                         |
| ANTIGEN PROCESSING AND PRESENTATION                        | 1.728092         | 0.004702                        |
| TUBERCULOSIS                                               | 1.515861         | 0.006935                        |
| RHEUMATOID ARTHRITIS                                       | 1.656786         | 0.008                           |
| VIBRIO CHOLERAE INFECTION                                  | 1.625489         | 0.010836                        |
| APOPTOSIS                                                  | 1.599561         | 0.011364                        |
| CHAGAS DISEASE (AMERICAN TRYPANOSOMIASIS)                  | 1.560899         | 0.011412                        |
| GAP JUNCTION                                               | 1.538637         | 0.012766                        |
| NEUROTROPHIN SIGNALING PATHWAY                             | 1.439027         | 0.014144                        |
| CHEMOKINE SIGNALING PATHWAY                                | 1.394057         | 0.019947                        |
| BLADDER CANCER                                             | 1.552929         | 0.022876                        |
| TOXOPLASMOSIS                                              | 1.476038         | 0.023916                        |
| SHIGELLOSIS                                                | 1.502287         | 0.025758                        |
| ECM-RECEPTOR INTERACTION                                   | 1.488929         | 0.026194                        |
| COLLECTING DUCT ACID SECRETION                             | 1.587351         | 0.027687                        |
| EPITHELIAL CELL SIGNALING IN HELICOBACTER PYLORI INFECTION | 1.517176         | 0.030347                        |
| CELL CYCLE                                                 | 1.38958          | 0.031208                        |

|                                           |          |          |
|-------------------------------------------|----------|----------|
| BACTERIAL INVASION OF EPITHELIAL CELLS    | 1.425374 | 0.035874 |
| NATURAL KILLER CELL MEDIATED CYTOTOXICITY | 1.41612  | 0.036819 |
| COLORECTAL CANCER                         | 1.391793 | 0.043027 |
| N-GLYCAN BIOSYNTHESIS                     | 1.390149 | 0.046899 |
| MINERAL ABSORPTION                        | 1.47998  | 0.049459 |
| PHOTOTRANSDUCTION                         | -2.78218 | 0        |
| OLFACTORY TRANSDUCTION                    | -1.73251 | 0.017073 |

<sup>a</sup> NES: normalized enrichment score.

<sup>b</sup> NOM *P* value: nominal *P* value.

**Table S5. Retinal gene sets beneficially affected by DOX pretreatment.** Gene expression in the retinas from DMSO-treated light-exposed *Abca4<sup>-/-</sup>Rdh8<sup>-/-</sup>* mice was compared to the gene expression in the retinas from DOX-pretreated light-exposed mice

| Gene set name                             | NES <sup>a</sup> | NOM <i>P</i> value <sup>b</sup> |
|-------------------------------------------|------------------|---------------------------------|
| CYTOKINE-CYTOKINE RECEPTOR INTERACTION    | 2.421621         | 0                               |
| P53 SIGNALING PATHWAY                     | 2.182522         | 0                               |
| HEPATITIS C                               | 2.104995         | 0                               |
| INFLUENZA A                               | 2.096623         | 0                               |
| MEASLES                                   | 2.025816         | 0                               |
| TOLL-LIKE RECEPTOR SIGNALING PATHWAY      | 1.985675         | 0                               |
| OSTEOCLAST DIFFERENTIATION                | 1.944466         | 0                               |
| CYTOSOLIC DNA-SENSING PATHWAY             | 1.903977         | 0                               |
| RHEUMATOID ARTHRITIS                      | 1.892949         | 0                               |
| LEISHMANIASIS                             | 1.892227         | 0                               |
| ANTIGEN PROCESSING AND PRESENTATION       | 1.781439         | 0                               |
| REGULATION OF ACTIN CYTOSKELETON          | 1.579483         | 0.001724                        |
| JAK-STAT SIGNALING PATHWAY                | 1.759936         | 0.00173                         |
| RIG-I-LIKE RECEPTOR SIGNALING PATHWAY     | 1.82371          | 0.001812                        |
| APOPTOSIS                                 | 1.754144         | 0.001866                        |
| CELL CYCLE                                | 1.658268         | 0.001869                        |
| MALARIA                                   | 1.89198          | 0.001938                        |
| CHAGAS DISEASE (AMERICAN TRYPANOSOMIASIS) | 1.658659         | 0.003571                        |
| TUBERCULOSIS                              | 1.674743         | 0.005396                        |
| MAPK SIGNALING PATHWAY                    | 1.548901         | 0.006689                        |
| LEUKOCYTE TRANSENDOTHELIAL MIGRATION      | 1.569841         | 0.008772                        |
| PORPHYRIN AND CHLOROPHYLL METABOLISM      | 1.684691         | 0.008993                        |
| BLADDER CANCER                            | 1.637299         | 0.011173                        |
| CHEMOKINE SIGNALING PATHWAY               | 1.405576         | 0.017986                        |
| TOXOPLASMOSIS                             | 1.512747         | 0.021277                        |
| TGF-BETA SIGNALING PATHWAY                | 1.488449         | 0.021858                        |
| CELL ADHESION MOLECULES (CAMs)            | 1.512765         | 0.022727                        |
| VIBRIO CHOLERAЕ INFECTION                 | 1.509372         | 0.02583                         |
| T CELL RECEPTOR SIGNALING PATHWAY         | 1.450954         | 0.026415                        |
| NATURAL KILLER CELL MEDIATED CYTOTOXICITY | 1.502091         | 0.026978                        |
| PHAGOSOME                                 | 1.418228         | 0.034545                        |
| RIBOSOME BIOGENESIS IN EUKARYOTES         | 1.427248         | 0.034602                        |
| MINERAL ABSORPTION                        | 1.447369         | 0.049116                        |
| PHOTOTRANSDUCTION                         | -2.74511         | 0                               |
| PARKINSON'S DISEASE                       | -1.54818         | 0                               |

|                                                      |          |          |
|------------------------------------------------------|----------|----------|
| OXIDATIVE PHOSPHORYLATION                            | -1.63641 | 0.002232 |
| HUNTINGTON'S DISEASE                                 | -1.3618  | 0.023913 |
| ALZHEIMER'S DISEASE                                  | -1.36465 | 0.034642 |
| GLYCOSAMINOGLYCAN BIOSYNTHESIS - CHONDROITIN SULFATE | -1.48782 | 0.044715 |

<sup>a</sup> NES: normalized enrichment score.

<sup>b</sup> NOM *P* value: nominal *P* value.

**Table S6. Significantly altered retinal gene sets as a result of bright light exposure in *Abca4*<sup>-/-</sup>*Rdh8*<sup>-/-</sup> mice.** Gene expression in the retinas from *Abca4*<sup>-/-</sup>*Rdh8*<sup>-/-</sup> mice exposed to bright light was compared to the gene expression in the retinas of mice that had not been exposed to bright light. These data were obtained from an independently repeated set of experiments that provided the controls for the retinal transcriptome analyses of mice that received combined treatments.

| Gene set name                             | NES <sup>a</sup> | NOM <i>P</i> value <sup>b</sup> |
|-------------------------------------------|------------------|---------------------------------|
| OSTEOCLAST DIFFERENTIATION                | 2.229871         | 0                               |
| CYTOKINE-CYTOKINE RECEPTOR INTERACTION    | 2.180506         | 0                               |
| HEPATITIS C                               | 2.12151          | 0                               |
| INFLUENZA A                               | 2.105985         | 0                               |
| TOLL-LIKE RECEPTOR SIGNALING PATHWAY      | 2.09756          | 0                               |
| JAK-STAT SIGNALING PATHWAY                | 2.079457         | 0                               |
| MEASLES                                   | 2.047953         | 0                               |
| LEISHMANIASIS                             | 2.041105         | 0                               |
| RIG-I-LIKE RECEPTOR SIGNALING PATHWAY     | 2.029745         | 0                               |
| CHAGAS DISEASE (AMERICAN TRYPANOSOMIASIS) | 2.001642         | 0                               |
| CYTOSOLIC DNA-SENSING PATHWAY             | 1.901548         | 0                               |
| APOPTOSIS                                 | 1.876382         | 0                               |
| TUBERCULOSIS                              | 1.852426         | 0                               |
| MAPK SIGNALING PATHWAY                    | 1.775217         | 0                               |
| ANTIGEN PROCESSING AND PRESENTATION       | 1.763592         | 0                               |
| CHEMOKINE SIGNALING PATHWAY               | 1.713428         | 0                               |
| B CELL RECEPTOR SIGNALING PATHWAY         | 1.737553         | 0.00125                         |
| RHEUMATOID ARTHRITIS                      | 1.81068          | 0.001376                        |
| TOXOPLASMOSIS                             | 1.682618         | 0.002404                        |
| LEUKOCYTE TRANSENDOTHELIAL MIGRATION      | 1.627085         | 0.003727                        |
| P53 SIGNALING PATHWAY                     | 1.718236         | 0.003906                        |
| INSULIN SIGNALING PATHWAY                 | 1.532373         | 0.004598                        |
| NEUROTROPHIN SIGNALING PATHWAY            | 1.605815         | 0.005688                        |
| PRION DISEASES                            | 1.670822         | 0.005755                        |
| SHIGELLOSIS                               | 1.642595         | 0.006369                        |
| T CELL RECEPTOR SIGNALING PATHWAY         | 1.609217         | 0.007344                        |
| CHRONIC MYELOID LEUKEMIA                  | 1.563919         | 0.007435                        |
| PATHWAYS IN CANCER                        | 1.423846         | 0.008333                        |
| REGULATION OF ACTIN CYTOSKELETON          | 1.425106         | 0.009772                        |
| PROTEASOME                                | 1.568564         | 0.010038                        |
| TYPE II DIABETES MELLITUS                 | 1.59443          | 0.012146                        |
| ACUTE MYELOID LEUKEMIA                    | 1.566775         | 0.013924                        |
| AMYOTROPHIC LATERAL SCLEROSIS (ALS)       | 1.540152         | 0.014103                        |
| ADIPOCYTOKINE SIGNALING PATHWAY           | 1.56679          | 0.016291                        |
| DORSO-VENTRAL AXIS FORMATION              | 1.642545         | 0.016296                        |



|                                       |          |          |
|---------------------------------------|----------|----------|
| MALARIA                               | 1.573381 | 0.027356 |
| THYROID CANCER                        | 1.550927 | 0.027941 |
| WNT SIGNALING PATHWAY                 | 1.457934 | 0.028868 |
| PANCREATIC CANCER                     | 1.479344 | 0.030113 |
| PATHOGENIC ESCHERICHIA COLI INFECTION | 1.497784 | 0.030872 |
| TGF-BETA SIGNALING PATHWAY            | 1.464963 | 0.032298 |
| BASE EXCISION REPAIR                  | 1.509695 | 0.036061 |
| CELL CYCLE                            | 1.359097 | 0.044118 |
| DILATED CARDIOMYOPATHY                | 1.420122 | 0.04534  |
| GNRH SIGNALING PATHWAY                | 1.418318 | 0.047679 |
| PHOTOTRANSDUCTION                     | -2.70085 | 0        |
| OXIDATIVE PHOSPHORYLATION             | -1.33032 | 0.036232 |

<sup>a</sup> NES: normalized enrichment score.

<sup>b</sup> NOM *P* value: nominal *P* value.

**Table S7. Retinal gene sets beneficially affected as a result of combined pretreatment with BRM, MTP, and TAM.** Gene expression in the retinas from DMSO-treated light-exposed *Abca4<sup>-/-</sup>Rdh8<sup>-/-</sup>* mice was compared to the gene expression in the retinas from light-exposed mice pretreated with BRM, MTP, and TAM.

| Gene set name                             | NES <sup>a</sup> | NOM <i>P</i> value <sup>b</sup> |
|-------------------------------------------|------------------|---------------------------------|
| INFLUENZA A                               | 2.143801         | 0                               |
| OSTEOCLAST DIFFERENTIATION                | 2.14301          | 0                               |
| CYTOKINE-CYTOKINE RECEPTOR INTERACTION    | 2.126632         | 0                               |
| TOLL-LIKE RECEPTOR SIGNALING PATHWAY      | 2.102577         | 0                               |
| MEASLES                                   | 1.991847         | 0                               |
| P53 SIGNALING PATHWAY                     | 1.981955         | 0                               |
| JAK-STAT SIGNALING PATHWAY                | 1.973431         | 0                               |
| HEPATITIS C                               | 1.964715         | 0                               |
| LEISHMANIASIS                             | 1.945592         | 0                               |
| CYTOSOLIC DNA-SENSING PATHWAY             | 1.857026         | 0                               |
| PATHOGENIC ESCHERICHIA COLI INFECTION     | 1.83432          | 0                               |
| APOPTOSIS                                 | 1.81466          | 0                               |
| TOXOPLASMOSIS                             | 1.683499         | 0                               |
| MAPK SIGNALING PATHWAY                    | 1.671156         | 0                               |
| PATHWAYS IN CANCER                        | 1.504963         | 0                               |
| CHAGAS DISEASE (AMERICAN TRYPANOSOMIASIS) | 1.790724         | 0.001202                        |
| RIG-I-LIKE RECEPTOR SIGNALING PATHWAY     | 2.039497         | 0.001299                        |
| TUBERCULOSIS                              | 1.601844         | 0.002345                        |
| VIRAL MYOCARDITIS                         | 1.682111         | 0.002717                        |
| RHEUMATOID ARTHRITIS                      | 1.706822         | 0.006793                        |
| DORSO-VENTRAL AXIS FORMATION              | 1.689233         | 0.008415                        |
| PROTEASOME                                | 1.604089         | 0.01005                         |
| CHEMOKINE SIGNALING PATHWAY               | 1.566392         | 0.010274                        |
| NEUROTROPHIN SIGNALING PATHWAY            | 1.45211          | 0.011403                        |
| ANTIGEN PROCESSING AND PRESENTATION       | 1.68035          | 0.012162                        |
| LEUKOCYTE TRANSENDOTHELIAL MIGRATION      | 1.529136         | 0.013699                        |
| B CELL RECEPTOR SIGNALING PATHWAY         | 1.55796          | 0.015385                        |
| CHRONIC MYELOID LEUKEMIA                  | 1.512632         | 0.015951                        |
| MALARIA                                   | 1.642832         | 0.016517                        |

|                                      |          |          |
|--------------------------------------|----------|----------|
| PHAGOSOME                            | 1.484726 | 0.016867 |
| AXON GUIDANCE                        | 1.487379 | 0.017026 |
| INSULIN SIGNALING PATHWAY            | 1.458486 | 0.020737 |
| PRION DISEASES                       | 1.596309 | 0.021645 |
| ACUTE MYELOID LEUKEMIA               | 1.539761 | 0.023591 |
| SHIGELLOSIS                          | 1.434921 | 0.031095 |
| CELL CYCLE                           | 1.396446 | 0.031432 |
| NOTCH SIGNALING PATHWAY              | 1.48805  | 0.033333 |
| ADIPOCYTOKINE SIGNALING PATHWAY      | 1.455296 | 0.03607  |
| REGULATION OF ACTIN CYTOSKELETON     | 1.361143 | 0.04102  |
| PORPHYRIN AND CHLOROPHYLL METABOLISM | 1.455169 | 0.041547 |
| AMYOTROPHIC LATERAL SCLEROSIS (ALS)  | 1.447752 | 0.042308 |
| THYROID CANCER                       | 1.46991  | 0.048091 |
| PHOTOTRANSDUCTION                    | -2.78328 | 0        |
| PARKINSON'S DISEASE                  | -1.29663 | 0.021583 |
| OXIDATIVE PHOSPHORYLATION            | -1.3763  | 0.022901 |
| OLFACTORY TRANSDUCTION               | -1.60694 | 0.025806 |

<sup>a</sup> NES: normalized enrichment score.

<sup>b</sup> NOM *P* value: nominal *P* value.

**Table S8. Retinal gene sets beneficially affected as a result of combined pretreatment with BRM, MTP, and DOX.** Gene expression in the retinas from DMSO-treated light-exposed *Abca4<sup>-/-</sup>Rdh8<sup>-/-</sup>* mice was compared to the gene expression in the retinas from light-exposed mice pretreated with BRM, MTP, and DOX.

| Gene set name                             | NES <sup>a</sup> | NOM <i>P</i> value <sup>b</sup> |
|-------------------------------------------|------------------|---------------------------------|
| OSTEOCLAST DIFFERENTIATION                | 2.303482         | 0                               |
| TOLL-LIKE RECEPTOR SIGNALING PATHWAY      | 2.212396         | 0                               |
| HEPATITIS C                               | 2.167976         | 0                               |
| INFLUENZA A                               | 2.111236         | 0                               |
| CHAGAS DISEASE (AMERICAN TRYPANOSOMIASIS) | 2.054227         | 0                               |
| CYTOKINE-CYTOKINE RECEPTOR INTERACTION    | 2.042606         | 0                               |
| LEISHMANIASIS                             | 1.990311         | 0                               |
| JAK-STAT SIGNALING PATHWAY                | 1.91761          | 0                               |
| TUBERCULOSIS                              | 1.899948         | 0                               |
| MEASLES                                   | 1.89661          | 0                               |
| APOPTOSIS                                 | 1.888334         | 0                               |
| RIG-I-LIKE RECEPTOR SIGNALING PATHWAY     | 1.844952         | 0                               |
| MAPK SIGNALING PATHWAY                    | 1.828108         | 0                               |
| RHEUMATOID ARTHRITIS                      | 1.758656         | 0                               |
| CHEMOKINE SIGNALING PATHWAY               | 1.668104         | 0.001449                        |
| T CELL RECEPTOR SIGNALING PATHWAY         | 1.570795         | 0.0016                          |
| CYTOSOLIC DNA-SENSING PATHWAY             | 1.68831          | 0.001686                        |
| NEUROTROPHIN SIGNALING PATHWAY            | 1.561962         | 0.004451                        |
| P53 SIGNALING PATHWAY                     | 1.68567          | 0.006483                        |
| TOXOPLASMOSIS                             | 1.54663          | 0.012048                        |
| ERBB SIGNALING PATHWAY                    | 1.483864         | 0.012658                        |
| INSULIN SIGNALING PATHWAY                 | 1.439256         | 0.017991                        |
| PROTEASOME                                | 1.4892           | 0.019704                        |
| PATHOGENIC ESCHERICHIA COLI INFECTION     | 1.548095         | 0.021595                        |

|                                                            |          |          |
|------------------------------------------------------------|----------|----------|
| TYPE II DIABETES MELLITUS                                  | 1.560293 | 0.021703 |
| ANTIGEN PROCESSING AND PRESENTATION                        | 1.536125 | 0.024221 |
| AMYOTROPHIC LATERAL SCLEROSIS (ALS)                        | 1.532355 | 0.025641 |
| B CELL RECEPTOR SIGNALING PATHWAY                          | 1.54414  | 0.028007 |
| PANCREATIC CANCER                                          | 1.456896 | 0.034596 |
| ADIPOCYTOKINE SIGNALING PATHWAY                            | 1.460983 | 0.035032 |
| PHAGOSOME%KEGG                                             | 1.385304 | 0.039695 |
| EPITHELIAL CELL SIGNALING IN HELICOBACTER PYLORI INFECTION | 1.467262 | 0.044343 |
| AMINOACYL-TRNA BIOSYNTHESIS                                | 1.439216 | 0.046358 |
| CELL CYCLE                                                 | 1.388515 | 0.046377 |
| GNRH SIGNALING PATHWAY                                     | 1.4003   | 0.047546 |
| PHOTOTRANSDUCTION                                          | -2.31083 | 0        |
| PROTEIN DIGESTION AND ABSORPTION                           | -2.03409 | 0        |
| ECM-RECEPTOR INTERACTION                                   | -1.68148 | 0.005168 |
| GLUTATHIONE METABOLISM                                     | -1.62617 | 0.012376 |
| PROXIMAL TUBULE BICARBONATE RECLAMATION                    | -1.68127 | 0.015945 |
| FOCAL ADHESION                                             | -1.40136 | 0.016077 |
| PROPANOATE METABOLISM                                      | -1.50335 | 0.025943 |
| SMALL CELL LUNG CANCER                                     | -1.45885 | 0.033537 |
| ALDOSTERONE-REGULATED SODIUM REABSORPTION                  | -1.48797 | 0.049261 |

<sup>a</sup> NES: normalized enrichment score.

<sup>b</sup> NOM *P* value: nominal *P* value.
